# Supplementary material for: Efficient radical-based near-infrared organic light-emitting diodes with an emission peak exceeding 800 nm
Source: Royal Society of Chemistry journal article supplement (doi:10.1039/d3tc03017b), 2023-01-01
Supplement: d3tc03017b1.pdf [file d3tc03017b1.pdf]

# **Efficient Radical-Based NIR Organic Light-Emitting Diodes with Emission peak Exceeding 800 nm**

Kuo Lv, Ming Zhang and Feng Li\*

State Key Laboratory of Supramolecular Structure and Materials, College of  
Chemistry, Jilin University Changchun, 130012, P. R. China

\*E-mail: [lifeng01@jlu.edu.cn](mailto:lifeng01@jlu.edu.cn)

## **Contents**

1. Synthesis Section
2. Photophysical parameters of **TTM-NPNA** in different solvents
3. TGA curve and electrochemical properties
4. Extracted results of TD-DFT calculations
5. Electroluminescence Performances
6. References

## General information

All reagents and solvents required for synthesis and characterization are purchased from commercial suppliers and used directly without any treatment. The nuclear magnetic resonance ( $^1\text{H}$  NMR) spectra were recorded on the Bruker AVANCEIII 500 spectrometer at 500 MHz at 298 K and tetramethyl silane (TMS) ( $\delta\text{H} = 0$  ppm) as the internal standard. MALDI-TOF mass spectra were recorded on a Bruker Autoflex speed TOF/TOF mass spectrometer with DCTB as a matrix. A Shimadzu UV-2550 spectrophotometer was applied to record the ultraviolet (UV)-visible spectra. Fluorescence spectra were recorded using a RF-5301 PC spectrophotometer and QE pro. All of PLQEs are determined with a calibrated integrating sphere system and using QE pro of Ocean Insight as fluorescence spectrometer. The electrochemical oxidation and reduction potentials were recorded using an electrochemical analyzer (CHI660C, CH Instruments, USA). The fluorescence decay spectra were recorded on an Edinburgh fluorescence spectrometer (FLS980), and the lifetime of the excited states was measured by the time-correlated single photon counting method under the excitation of a laser (378 nm). Elemental analysis (C, H and N) was performed on a Elementar Vario micro cube elemental analyzer. Thermal gravimetric analysis (TGA) was characterized by a TAINSTRUMENTS Q500 TGA analyzer. Ready-made indium tin oxide (ITO) glass substrates were purchased and cleaned. After dried with  $\text{N}_2$ , they were treated with UV irradiation for 20 min and next transferred to a vacuum deposition system with the pressure of  $1-4 \times 10^{-6}$  mbar. The  $\text{MoO}_3$  layer was deposited at a rate of  $0.1 \text{ \AA s}^{-1}$ . All the organic layers were deposited at  $0.2-0.4 \text{ \AA s}^{-1}$ . The evaporation rate of cathode LiF

and Al metal layer were  $0.1 \text{ \AA s}^{-1}$  and  $0.3\text{-}0.8 \text{ \AA s}^{-1}$  respectively. The current-voltage characteristics were measured using a Keithley 2400 programmable electrometer. The EL spectra and EQEs were measured using QE pro spectroradiometer of Ocean Insight together with a calibrated integrating sphere at room temperature in glove box.

## 1. Synthesis Section

The HTTM was prepared as reported<sup>1</sup>.

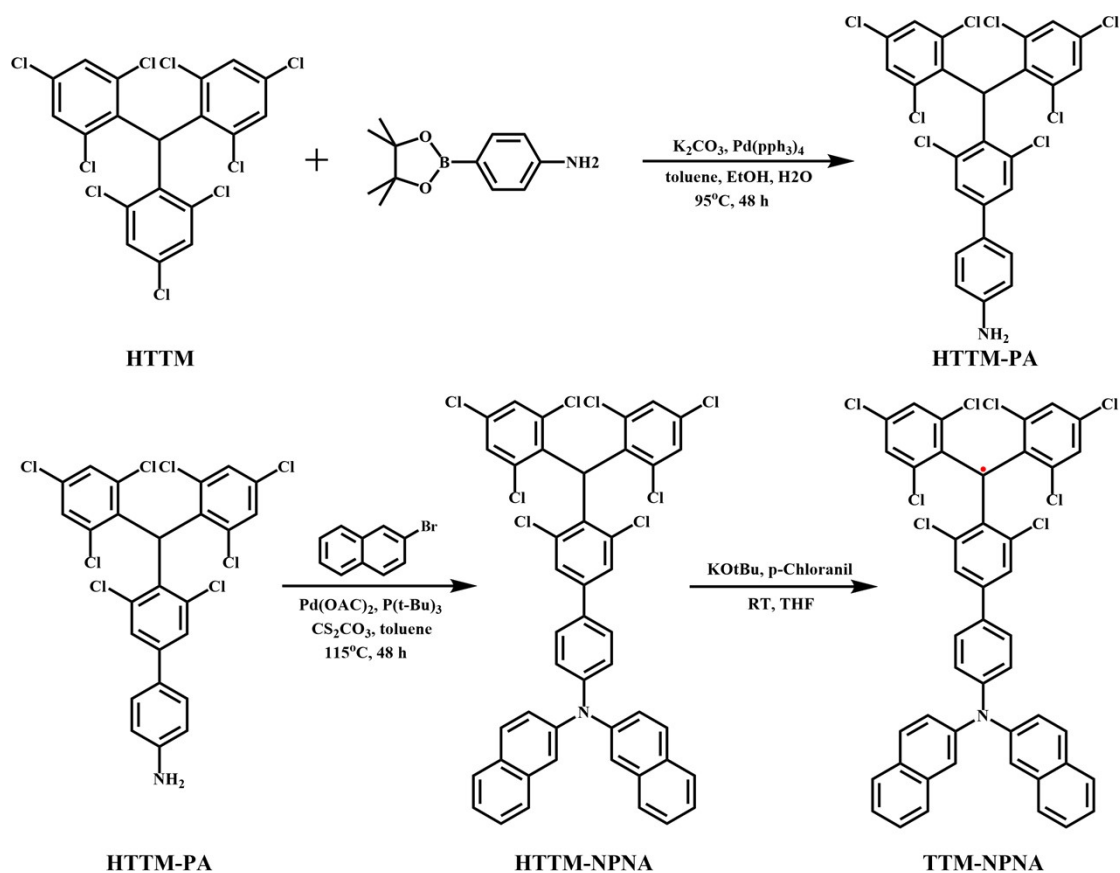

Scheme S1. The synthesis route of **TTM-NPNA**

### (1) Synthesis of **HTTM-PA**

HTTM (1.00 g, 1.80 mmol) and 4-(4,4,5,5-tetramethyl-1,3,2-dioxaborolan-2-yl)aniline (0.39 g, 1.80 mmol) was dissolved in a mixed solvent of toluene (12 ml),  $\text{K}_3\text{PO}_4$  aqueous solution (8 ml, 2 mol / L) and ethanol (4 ml), and catalyst  $\text{Pd}(\text{PPh}_3)_4$  (0.10 g, 0.09 mmol) was added under argon atmosphere. The mixture was stirred at  $95^\circ\text{C}$  for 48

h under argon atmosphere. After the reaction mixture cooling to room temperature, the solution was extracted with dichloromethane. Organic layer was collected and dried. The solvent was removed under vacuum and the crude product was purified by silica gel column chromatography (using petroleum ether: dichloromethane = 8:1 v/v). **HTTM-PA** was obtained as a white solid (0.39 g, 36% yield).  $^1\text{H}$  NMR (500 MHz,  $\text{CD}_2\text{Cl}_2$ )  $\delta$  7.54 (d,  $J = 2.0$  Hz, 1H), 7.41 (s, 2H), 7.41 – 7.40 (m, 2H), 7.39 (s, 1H), 7.29 – 7.25 (m, 2H), 6.76 (s, 1H), 6.75 (d,  $J = 3.7$  Hz, 2H), 4.08 (s, 2H). MALDI-TOF-MS (m/z): calculated for  $\text{C}_{25}\text{H}_{13}\text{Cl}_8\text{N}$ , 608.853; found, 608.664. Elem. Anal. Calcd for  $\text{C}_{25}\text{H}_{13}\text{Cl}_8\text{N}$ : C 49.15, H 2.14, N 2.29; found, C 50.11, H 2.43, N 2.29.

## (2) Preparation of **HTTM-NPNA**

**HTTM-PA** (1.22 g, 2.00 mmol) and 2-bromonaphthalene (1.24 g, 6.00 mmol) was dissolved in dry toluene (25 ml).  $\text{Pt}(\text{t-Bu})_3$  (0.62 ml, 10%w/v, 0.30 mmol),  $\text{Cs}_2\text{CO}_3$  (1.95 g, 6.00 mmol) and catalyst  $\text{Pd}(\text{OAc})_2$  (33.70 mg, 0.15 mmol) was added under argon atmosphere. The mixture was stirred at  $115^\circ\text{C}$  for 48 h under argon atmosphere. After the reaction mixture cooling to room temperature, the solution was extracted with dichloromethane. Organic layer was collected and dried. The solvent was removed under vacuum and the crude product was purified by silica gel column chromatography (using petroleum ether: dichloromethane = 10:1 v/v). **HTTM-NPNA** was obtained as a white solid (1.02 g, 59% yield).  $^1\text{H}$  NMR (500 MHz,  $\text{CD}_2\text{Cl}_2$ )  $\delta$  7.84 (s, 1H), 7.82 (d,  $J = 2.7$  Hz, 2H), 7.81 (d,  $J = 2.4$  Hz, 1H), 7.66 (d,  $J = 2.1$  Hz, 1H), 7.65 (s, 1H), 7.54 (s, 2H), 7.44 (d,  $J = 1.9$  Hz, 1H), 7.43 (s, 2H), 7.42 (d,  $J = 2.1$  Hz, 2H), 7.38 (d,  $J = 2.2$  Hz, 1H), 7.34 (d,  $J = 2.2$  Hz, 1H), 7.32 (d,  $J = 2.2$  Hz, 2H), 7.24 (d,  $J = 2.2$  Hz, 1H), 7.07

(d,  $J = 2.4$  Hz, 1H), 6.93 (d,  $J = 2.4$  Hz, 1H), 6.71 (s, 1H). MALDI-TOF-MS ( $m/z$ ): calculated for  $C_{45}H_{25}Cl_8N$ , 862.944; found, 862.063. Elem. Anal. Calcd for  $C_{45}H_{25}Cl_8N$ : C 62.61, H 2.92, N 1.62; found, C 62.65, H 2.80, N 1.63.

### (3) Preparation of **TTM-NPNA**

Under argon atmosphere and in the dark, **HTTM-NPNA** (0.86 g, 1.00 mmol) was dissolved in dry THF (20 ml). Then *t*-BuOK (1.12 g, 10.00 mmol) was added. The solution was stirred for 5 h in the dark at room temperature, and then *p*-Chloranil (1.23 g, 5.00 mmol) was added. The solution was stirred for further 1 h. After the reaction finished, the solvent was removed under vacuum and the crude product was purified by silica gel column chromatography (using petroleum ether: dichloromethane = 10:1 v/v). The crude product was recrystallized twice from dichloromethane and methanol and a gray solid was obtained (0.65 g, 75% yield). MALDI-TOF-MS ( $m/z$ ): calculated for  $C_{45}H_{24}Cl_8N$ , 861.936; found, 861.064. Elem. Anal. Calcd for  $C_{45}H_{24}Cl_8N$ : C 62.68, H 2.81, N 1.62; found, C 62.80, H 2.92, N 1.58.

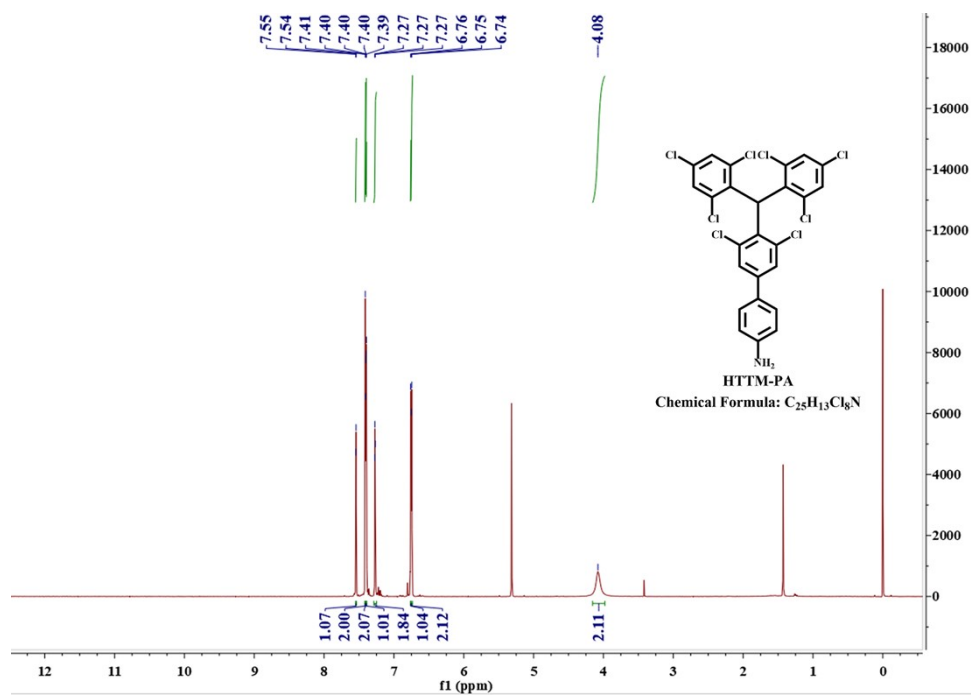

Fig. S1  $^1H$ -NMR spectrum of HTTM-PA in  $CD_2Cl_2$ .

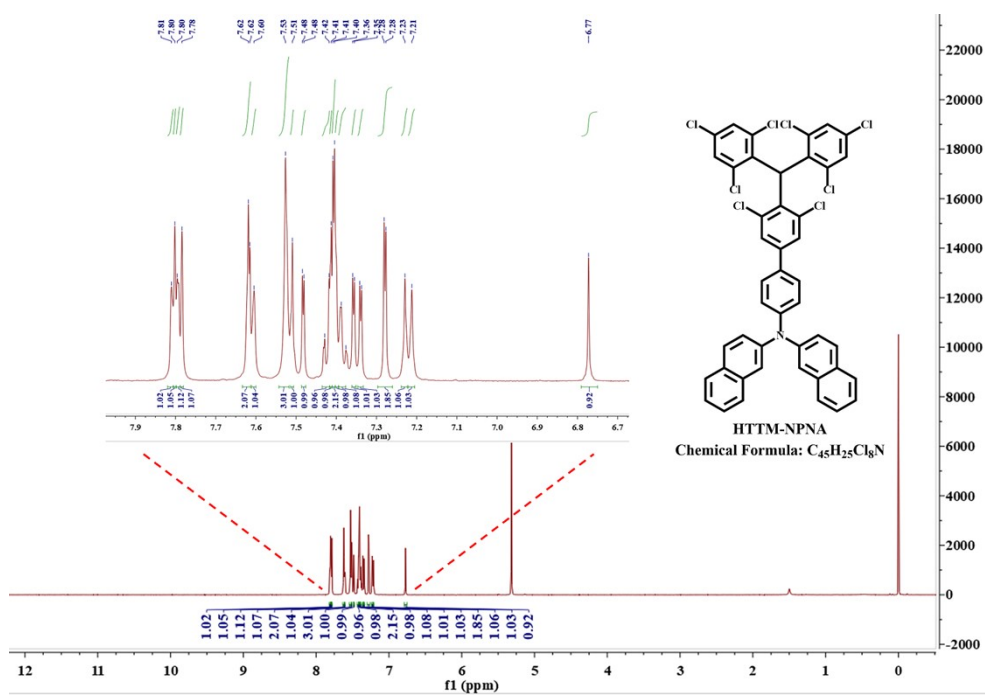

Fig. S2  $^1H$ -NMR spectrum of HTTM-NPNA in  $CD_2Cl_2$ .

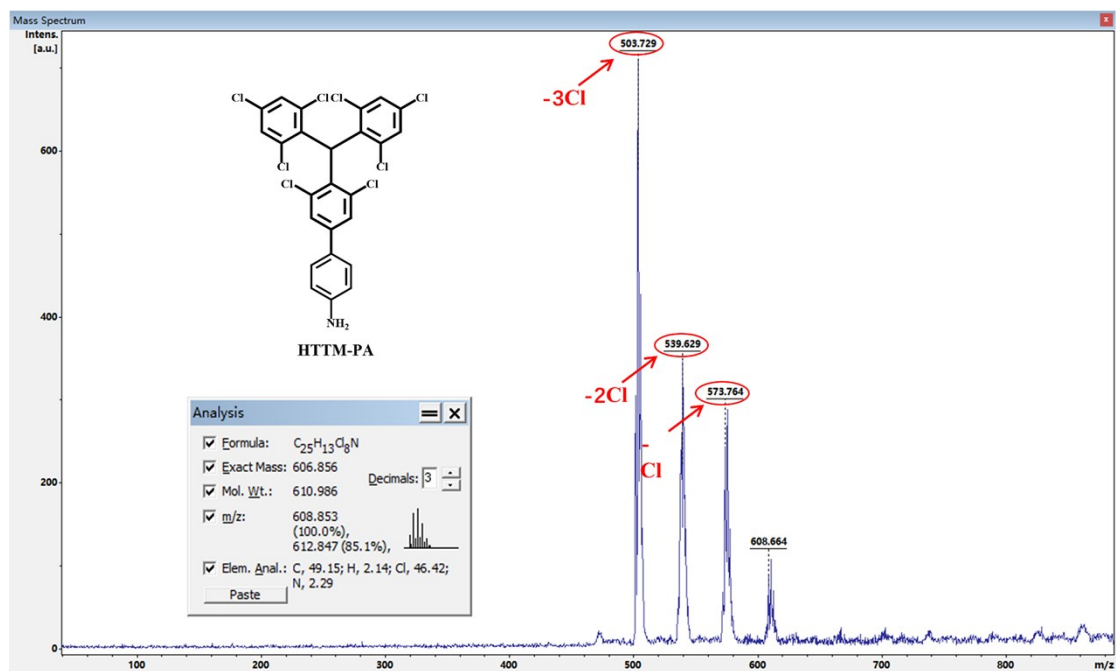

Fig. S3 MALDI-TOF-MS spectrum of HTTM-PA.

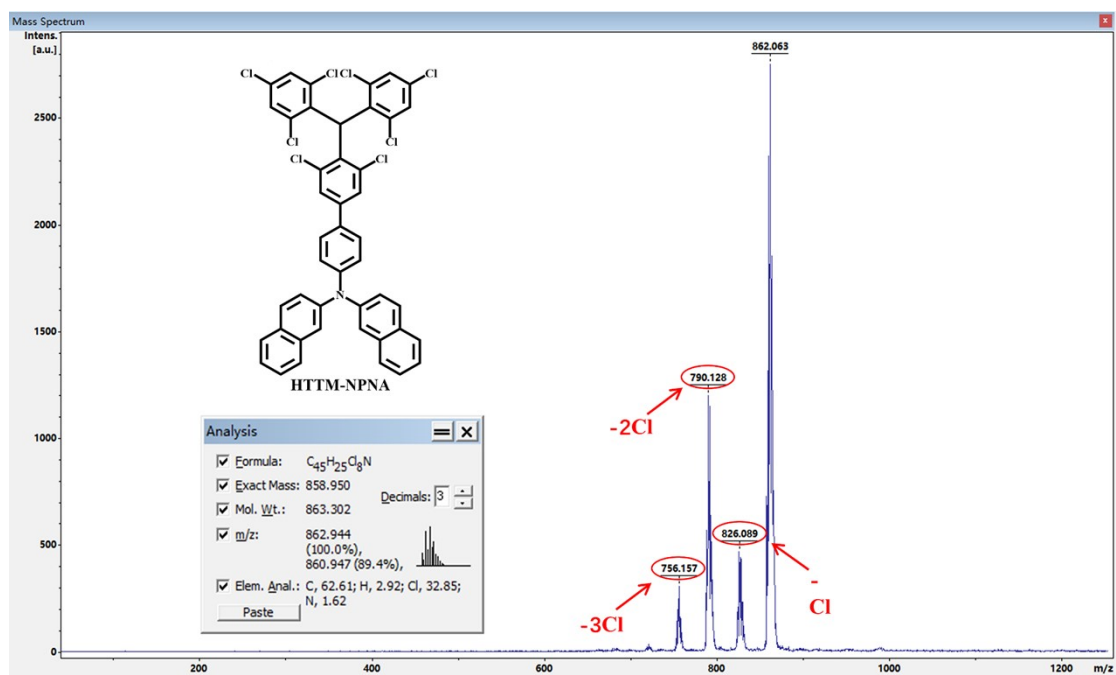

Fig. S4 MALDI-TOF-MS spectrum of HTTM-NPNA.

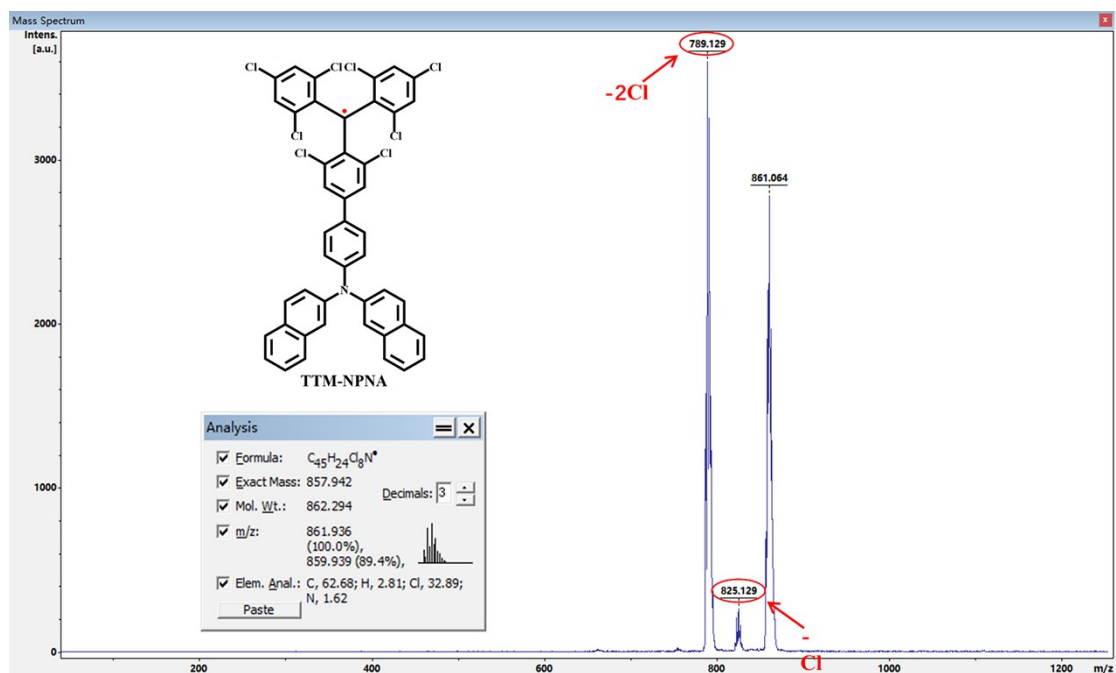

Fig. S5 MALDI-TOF-MS spectrum of TTM-NPNA.

## 2. Photophysical Parameters of TTM-NPNA in different solvents

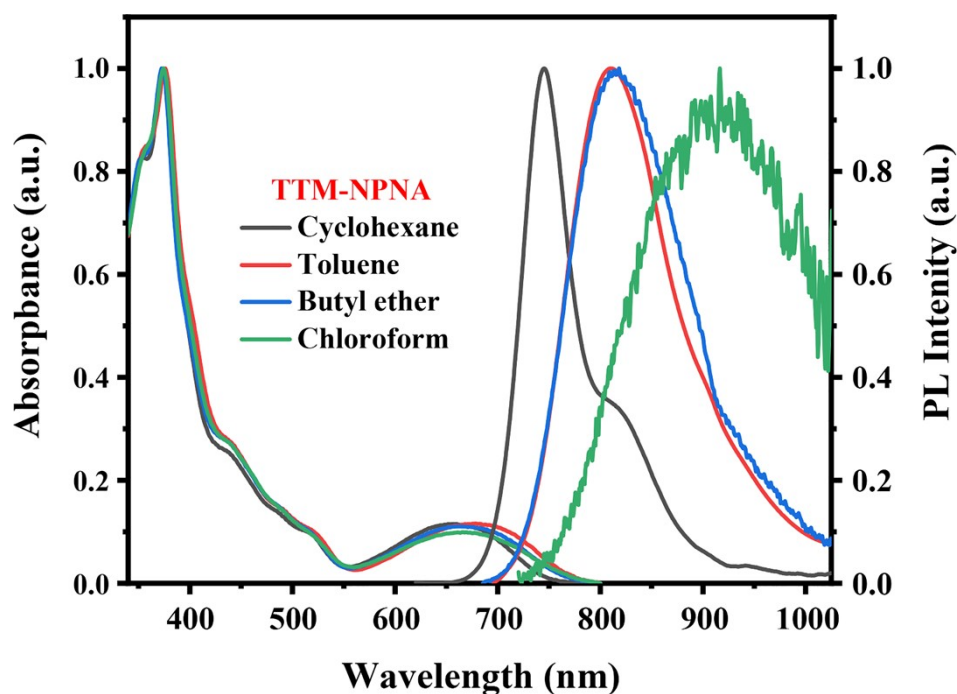

Fig. S6 The normalized UV-vis absorption and PL spectra of TTM-NPNA in various solvents ( $10^{-5}$  M) at room temperature.



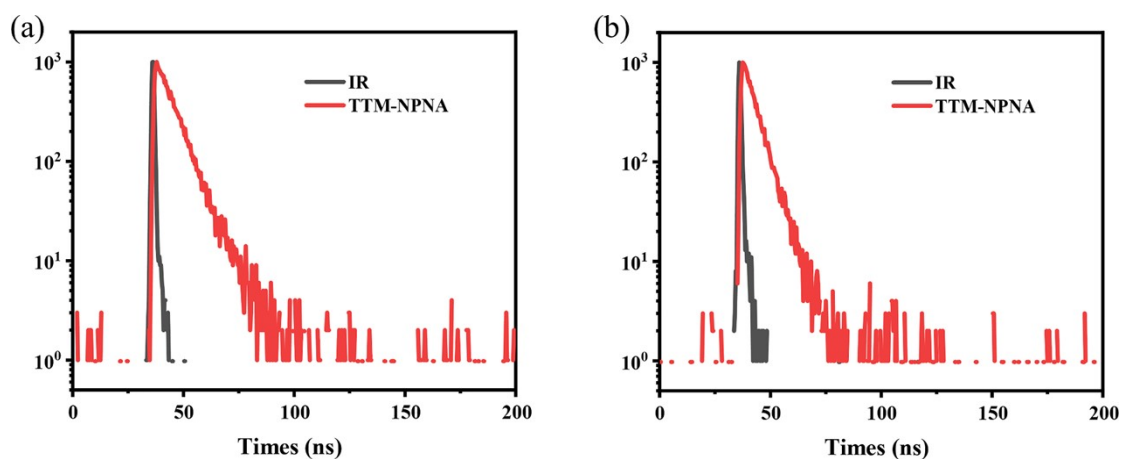

Fig. S7 Fluorescence decay curves of TTM-NPNA in (a) toluene and (b) n-butyl ether.

Table S1. Photophysical parameters of TTM-NPNA in different solvents.

| Radical      | Solvent       | $\lambda_{\text{abs}}^{[a]}$<br>(nm) | $\lambda_{\text{PL}}^{[b][c]}$<br>(nm) | PLQE <sup>[b][c]</sup><br>(%) | $\tau$ <sup>[d]</sup><br>(ns) | $k_r^{\text{CT}[e]}$<br>$10^7$ ( $\text{s}^{-1}$ ) | $k_{\text{nr}}^{\text{CT}[e]}$<br>$10^7$ ( $\text{s}^{-1}$ ) |
|--------------|---------------|--------------------------------------|----------------------------------------|-------------------------------|-------------------------------|----------------------------------------------------|--------------------------------------------------------------|
| TTM-<br>NPNA | cyclohexane   | 655                                  | 745                                    | 23                            | 6.7                           | 3.41                                               | 11.42                                                        |
|              | toluene       | 671                                  | 810                                    | 24                            | 7.3                           | 3.27                                               | 10.36                                                        |
|              | n-butyl ether | 665                                  | 818                                    | 16                            | 5.3                           | 3.01                                               | 15.82                                                        |
|              | chloroform    | 669                                  | 916                                    | 1                             | -[f]                          | -                                                  | -                                                            |

[a] long-wavelength absorption in different solvents. [b] excited at 375nm. [c] measured with a calibrated integrating sphere system. [d] measured using Edinburgh fluorescence spectrometer (FLS980) at room temperature. [e] Calculated from the equation:  $\phi = k_r/(k_r + k_{\text{nr}})$ ;  $\tau = 1/(k_r + k_{\text{nr}})$ . [f] beyond the measurement-range of the instruments.

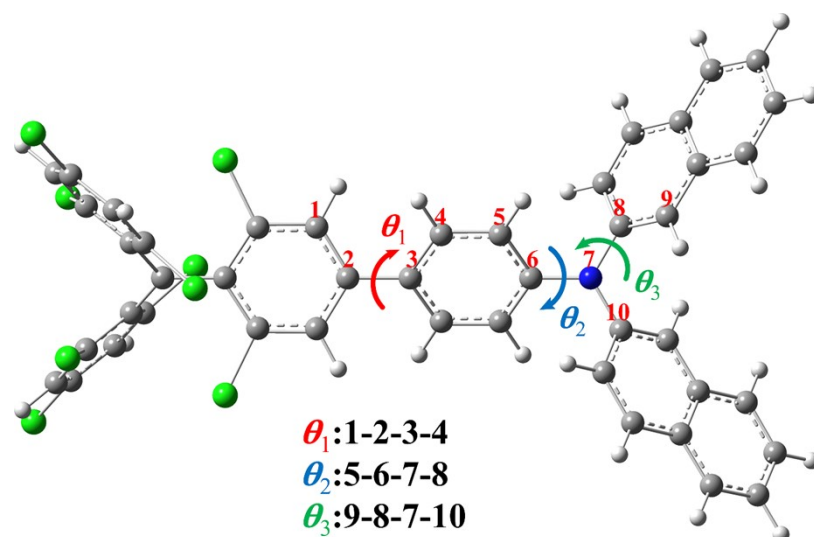

Fig. S8 The optimized geometry configuration of  $D_0$  state and the related dihedral angles ( $\theta_1$ ,  $\theta_2$  and  $\theta_3$ ) for TTM-NPNA in cyclohexane.

Table S2. The dihedral angle values of  $\theta_1$ -  $\theta_3$  and their variations between  $D_0$  and  $D_1$  states.

| TTM-<br>NPNA | $\theta_1(^{\circ})$ |       |                    | $\theta_2(^{\circ})$ |       |                    | $\theta_3(^{\circ})$ |       |                    |
|--------------|----------------------|-------|--------------------|----------------------|-------|--------------------|----------------------|-------|--------------------|
|              | $D_0$                | $D_1$ | $\Delta_{D_1-D_0}$ | $D_0$                | $D_1$ | $\Delta_{D_1-D_0}$ | $D_0$                | $D_1$ | $\Delta_{D_1-D_0}$ |
| cyclohexane  | 29.9                 | 35.9  | 6.0                | -34.8                | -53.2 | -18.4              | -44.4                | -35.0 | 9.4                |
| toluene      | 29.8                 | 35.2  | 5.4                | -34.7                | -51.9 | -17.2              | -44.5                | -35.3 | 9.2                |
| chloroform   | 29.4                 | 32.6  | 3.2                | -34.2                | -47.9 | -13.7              | -44.9                | -36.4 | 8.5                |

### 3. TGA curve and Electrochemical properties

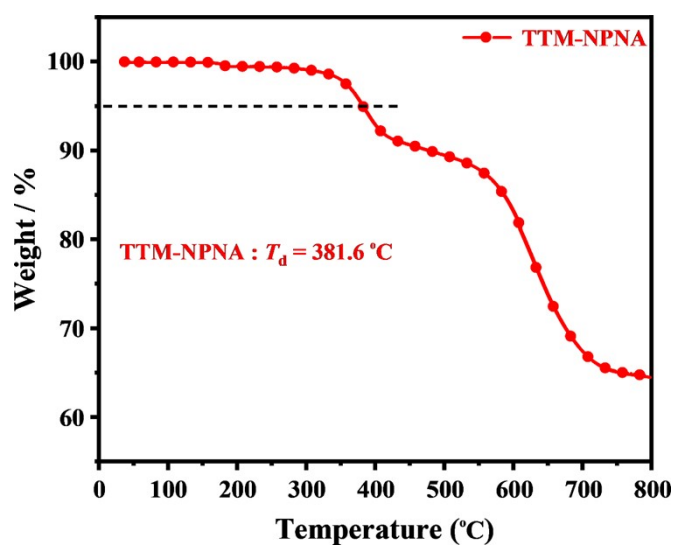

Fig. S9 TGA thermograph of TTM-NPNA recorded under nitrogen at a heating rate of  $10^{\circ}\text{C}/\text{min}$ .

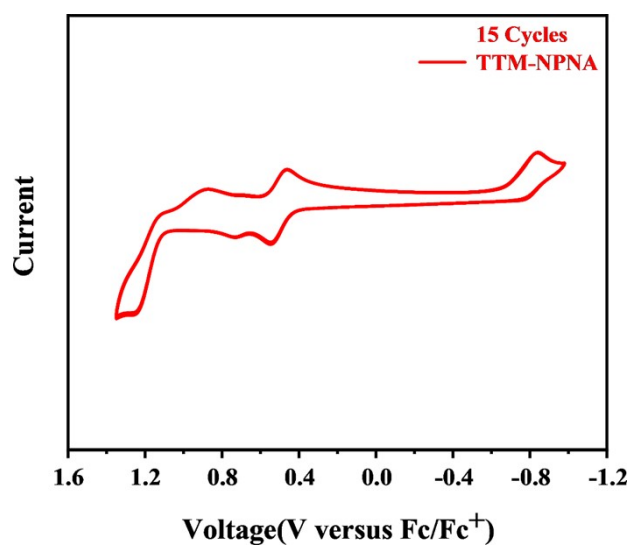

Fig. S10. Repeated cyclic voltammetry measurements (15 cycles) of TTM-NPNA.

## 4. Extracted results of TD-DFT calculations

TTM-NPNA (UB3LYP/6-31G(d,p))

Excitation energies and oscillator strengths:

Excited State 1: 2.091-A 1.5810 eV 784.20 nm f=0.1332  
<S\*\*2>=0.843  
218B ->219B 0.98617

This state for optimization and/or second-order correction.

Total Energy, E(TD-HF/TD-KS) = -5465.52635848

Copying the excited state density for this state as the 1-particle RhoCI density.

Excited State 2: 2.305-A 2.4508 eV 505.89 nm f=0.0056  
<S\*\*2>=1.078

218A ->220A -0.16112  
219A ->220A 0.29581  
209B ->219B 0.11975  
215B ->219B -0.44792  
217B ->219B 0.74203  
218B ->219B 0.14752  
218B ->220B -0.16418

Excited State 3: 3.438-A 2.4711 eV 501.73 nm f=0.0000  
<S\*\*2>=2.706

216A ->220A 0.11739  
216A ->224A 0.25205  
217A ->221A -0.22416  
218A ->221A -0.22240  
219A ->221A -0.52468  
219A ->227A -0.10348  
216B ->219B -0.16451  
216B ->220B -0.13409  
216B ->223B -0.24739  
217B ->221B 0.24547  
218B ->221B 0.54130

Excited State 4: 3.322-A 2.5607 eV 484.19 nm f=0.0493  
<S\*\*2>=2.509

216A ->221A -0.29310  
217A ->224A 0.17737  
218A ->224A 0.14744  
219A ->220A 0.47508

|             |          |
|-------------|----------|
| 219A ->224A | 0.27358  |
| 219A ->228A | 0.10079  |
| 216B ->221B | 0.29601  |
| 217B ->219B | -0.30468 |
| 217B ->223B | -0.19798 |
| 218B ->220B | -0.40712 |
| 218B ->223B | -0.26063 |

Excited State 5: 2.188-A 2.6616 eV 465.82 nm f=0.0090  
 $\langle S^{*2} \rangle = 0.947$

|             |          |
|-------------|----------|
| 218A ->222A | -0.23673 |
| 219A ->222A | 0.14212  |
| 210B ->219B | 0.14490  |
| 212B ->219B | 0.44213  |
| 213B ->219B | 0.54713  |
| 214B ->219B | -0.51927 |
| 216B ->219B | -0.26230 |

Excited State 6: 2.117-A 2.6638 eV 465.44 nm f=0.0018  
 $\langle S^{*2} \rangle = 0.871$

|             |          |
|-------------|----------|
| 212B ->219B | 0.11840  |
| 213B ->219B | 0.14405  |
| 214B ->219B | -0.15543 |
| 216B ->219B | 0.94935  |
| 218B ->221B | 0.11242  |

Excited State 7: 2.301-A 2.7531 eV 450.34 nm f=0.0195  
 $\langle S^{*2} \rangle = 1.074$

|             |          |
|-------------|----------|
| 216A ->221A | -0.11334 |
| 218A ->220A | 0.25456  |
| 219A ->220A | -0.17118 |
| 219A ->224A | 0.14007  |
| 209B ->219B | -0.24370 |
| 211B ->219B | -0.19640 |
| 215B ->219B | 0.57833  |
| 216B ->221B | 0.11402  |
| 217B ->219B | 0.57497  |
| 218B ->223B | -0.12426 |

Excited State 8: 2.154-A 2.7921 eV 444.05 nm f=0.0075  
 $\langle S^{*2} \rangle = 0.910$

|             |          |
|-------------|----------|
| 218A ->222A | -0.21466 |
| 219A ->222A | 0.14175  |
| 210B ->219B | 0.16996  |

|             |          |
|-------------|----------|
| 212B ->219B | 0.70755  |
| 213B ->219B | -0.38094 |
| 214B ->219B | 0.44804  |

Excited State 9: 2.970-A 2.8506 eV 434.93 nm f=0.1757  
 $\langle S^{*2} \rangle = 1.955$

|             |          |
|-------------|----------|
| 215A ->220A | 0.10446  |
| 216A ->221A | 0.24002  |
| 217A ->220A | -0.16295 |
| 217A ->224A | -0.15571 |
| 218A ->220A | -0.12064 |
| 219A ->220A | 0.48242  |
| 219A ->224A | -0.20922 |
| 219A ->228A | 0.12138  |
| 209B ->219B | -0.18184 |
| 211B ->219B | -0.35909 |
| 215B ->219B | 0.34148  |
| 215B ->220B | -0.11281 |
| 216B ->221B | -0.23546 |
| 217B ->220B | 0.17787  |
| 217B ->223B | 0.14267  |
| 218B ->220B | -0.13720 |
| 218B ->223B | 0.24333  |

Excited State 10: 2.111-A 2.9776 eV 416.39 nm f=0.0038  
 $\langle S^{*2} \rangle = 0.864$

|             |          |
|-------------|----------|
| 218A ->222A | -0.11999 |
| 218A ->223A | 0.14382  |
| 210B ->219B | 0.90067  |
| 212B ->219B | -0.31915 |

Excited State 11: 2.268-A 2.9836 eV 415.56 nm f=0.0115  
 $\langle S^{*2} \rangle = 1.036$

|             |          |
|-------------|----------|
| 218A ->220A | 0.13846  |
| 218A ->225A | 0.10267  |
| 209B ->219B | -0.41835 |
| 211B ->219B | 0.81426  |
| 218B ->220B | -0.12859 |

Excited State 12: 2.287-A 3.0839 eV 402.04 nm f=0.1136  
 $\langle S^{*2} \rangle = 1.057$

|             |          |
|-------------|----------|
| 212A ->222A | 0.13613  |
| 218A ->220A | -0.14279 |
| 218A ->228A | 0.14791  |

|             |          |
|-------------|----------|
| 218A ->232A | -0.12648 |
| 219A ->220A | 0.24898  |
| 206B ->219B | 0.12445  |
| 207B ->219B | 0.45049  |
| 209B ->219B | 0.48817  |
| 211B ->219B | 0.26632  |
| 212B ->222B | -0.10652 |
| 215B ->219B | 0.40018  |
| 217B ->219B | 0.11268  |
| 218B ->220B | 0.13171  |

Excited State 13: 2.469-A 3.1356 eV 395.41 nm f=0.6507  
<S\*\*2>=1.274

|             |          |
|-------------|----------|
| 216A ->221A | -0.10543 |
| 218A ->220A | -0.30671 |
| 218A ->224A | 0.11401  |
| 219A ->220A | 0.35587  |
| 207B ->219B | -0.21053 |
| 209B ->219B | -0.30319 |
| 216B ->221B | 0.12790  |
| 217B ->220B | -0.11150 |
| 218B ->220B | 0.69524  |
| 218B ->228B | -0.12173 |

Excited State 14: 2.894-A 3.2048 eV 386.87 nm f=0.0217  
<S\*\*2>=1.844

|             |          |
|-------------|----------|
| 216A ->220A | 0.11294  |
| 216A ->224A | 0.21049  |
| 217A ->221A | -0.31180 |
| 219A ->221A | 0.76182  |
| 219A ->226A | 0.10176  |
| 219A ->227A | -0.16421 |
| 216B ->223B | -0.19787 |
| 217B ->221B | 0.25372  |
| 218B ->221B | 0.14646  |

Excited State 15: 2.731-A 3.2572 eV 380.65 nm f=0.0279  
<S\*\*2>=1.614

|             |          |
|-------------|----------|
| 216A ->224A | -0.16668 |
| 217A ->221A | 0.20422  |
| 219A ->221A | 0.24924  |
| 216B ->220B | 0.11243  |
| 216B ->223B | 0.17949  |
| 217B ->221B | -0.27815 |

|             |         |
|-------------|---------|
| 218B ->221B | 0.78069 |
| 218B ->226B | 0.13456 |
| 218B ->227B | 0.10227 |

Excited State 16: 2.236-A 3.2636 eV 379.90 nm f=0.1915  
 $\langle S^{*2} \rangle = 1.000$

|             |          |
|-------------|----------|
| 218A ->222A | -0.54070 |
| 219A ->222A | 0.61709  |
| 210B ->219B | -0.27206 |
| 212B ->219B | -0.35738 |
| 213B ->219B | -0.12547 |
| 218B ->221B | 0.11944  |

Excited State 17: 2.096-A 3.2993 eV 375.79 nm f=0.0007  
 $\langle S^{*2} \rangle = 0.849$

|             |          |
|-------------|----------|
| 208B ->219B | -0.23315 |
| 213B ->219B | 0.67844  |
| 214B ->219B | 0.67843  |

Excited State 18: 2.532-A 3.3728 eV 367.60 nm f=0.0338  
 $\langle S^{*2} \rangle = 1.353$

|             |          |
|-------------|----------|
| 216A ->221A | 0.16670  |
| 217A ->224A | -0.12189 |
| 218A ->220A | 0.62369  |
| 219A ->220A | 0.33763  |
| 219A ->224A | 0.33325  |
| 215B ->219B | -0.22610 |
| 216B ->221B | -0.13436 |
| 217B ->223B | 0.15872  |
| 218B ->220B | 0.32236  |
| 218B ->223B | -0.10950 |

Excited State 19: 3.223-A 3.4075 eV 363.86 nm f=0.0011  
 $\langle S^{*2} \rangle = 2.347$

|             |          |
|-------------|----------|
| 214A ->221A | 0.11050  |
| 216A ->221A | 0.20603  |
| 217A ->224A | -0.22973 |
| 218A ->220A | -0.38489 |
| 218A ->224A | 0.10066  |
| 219A ->220A | -0.10652 |
| 219A ->224A | 0.51359  |
| 219A ->228A | -0.15923 |
| 216B ->221B | -0.20786 |
| 217B ->223B | 0.19834  |

|             |          |
|-------------|----------|
| 218B ->220B | -0.16868 |
| 218B ->223B | -0.43265 |
| 218B ->228B | -0.10084 |

Excited State 20: 2.383-A 3.4570 eV 358.64 nm f=0.0087  
 $\langle S^2 \rangle = 1.169$

|             |          |
|-------------|----------|
| 218A ->223A | -0.56986 |
| 219A ->223A | 0.72656  |
| 219A ->226A | -0.19102 |
| 210B ->219B | 0.15469  |
| 218B ->226B | 0.11843  |

## 5. Electroluminescence Performances

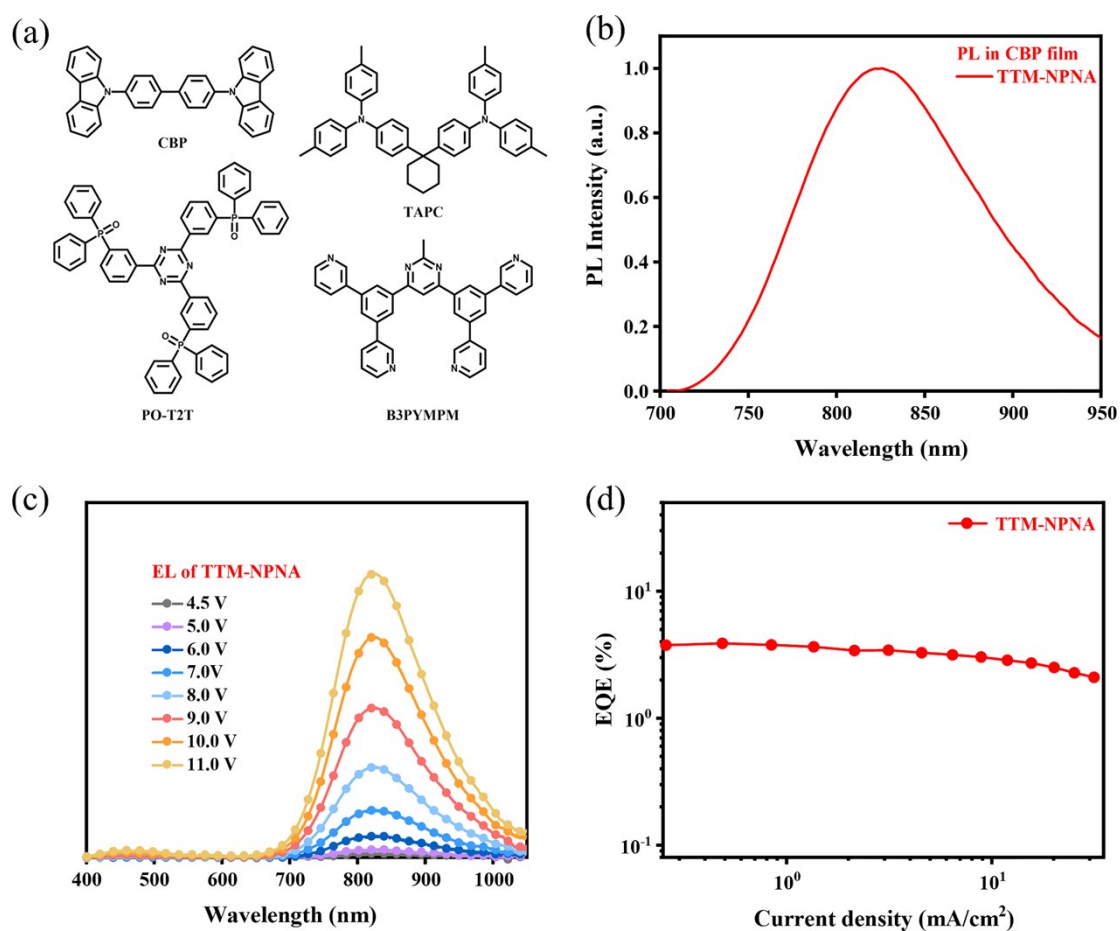

Fig. S11 Electroluminescent properties of **TTM-NPNA**. (a) Materials used in this work; (b) PL spectrum of the **TTM-NPNA** doped film (5.0 wt%-doped in CBP film); (c) EL spectra of **TTM-NPNA** from 4.5-11V; (d) The curve of current density versus EQE for **TTM-NPNA** based device.



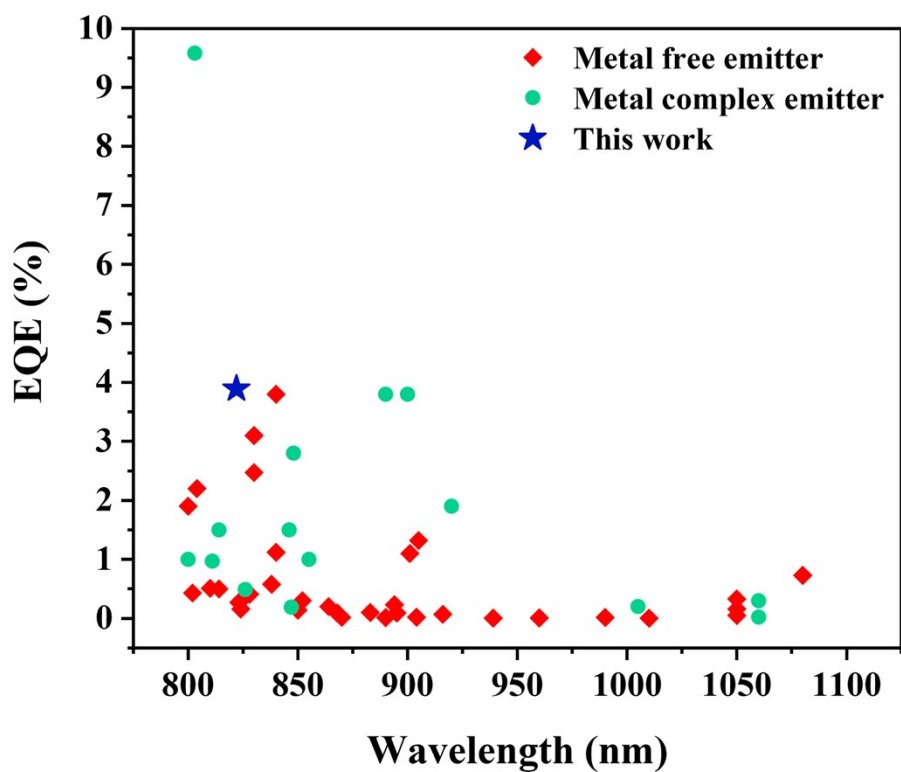

Fig. S12 Summary of EQE in state-of-the-art NIR-OLEDs against the EL peak wavelength (over 800 nm).

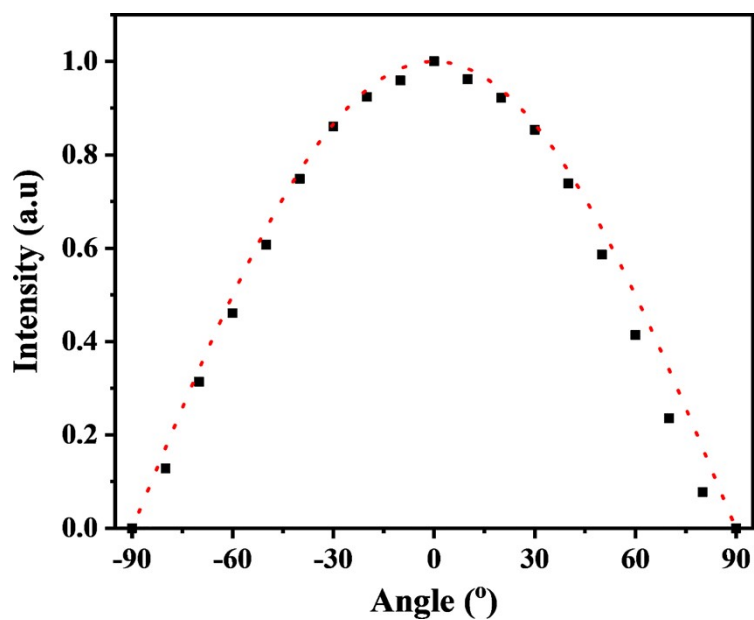

Fig. S13 Measured angular dependence of electroluminescence of TTM-NPNA based OLED with the dopant concentration of 5 wt% (black squares), and the angular dependence predicted for Lambertian emission (red dotted line).

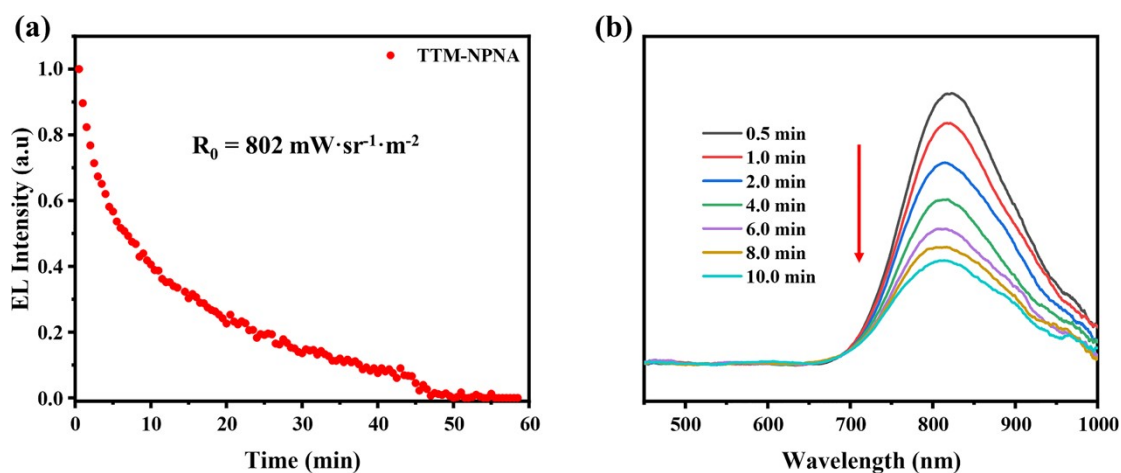

Fig. S14 Variation of (a) EL intensity and (b) spectra of the TTM-NPNA based device versus operating time driven at a constant current density of 6 mA/cm<sup>2</sup>.

Table S3. Summary of the device performances of NIR-OLEDs published to date with maximum electroluminescent (EL) wavelength over 800 nm.

| $\lambda_{ELmax}$<br>(nm) | EQE<br>(%) | Emitter material   | [ref]            | $\lambda_{ELmax}$<br>(nm) | EQE (%) | Emitter material      | [ref] |
|---------------------------|------------|--------------------|------------------|---------------------------|---------|-----------------------|-------|
| 800                       | 1.9        | metal free emitter | 2                | 800                       | 1       | metal complex emitter | 3     |
| 802                       | 0.43       | metal free emitter | 4                | 803                       | 9.58    | metal complex emitter | 5     |
| 804                       | 2.2        | metal free emitter | 6                | 811                       | 0.97    | metal complex emitter | 7     |
| 810                       | 0.51       | metal free emitter | 8                | 814                       | 1.5     | metal complex emitter | 9     |
| 814                       | 0.5        | metal free emitter | 10               | 826                       | 0.49    | metal complex emitter | 11    |
| 822                       | 3.9        | metal free emitter | <b>This work</b> | 847                       | 0.19    | metal complex emitter | 13    |
| 823                       | 0.27       | metal free emitter | 12               | 848                       | 2.8     | metal complex emitter | 15    |
| 824                       | 0.16       | metal free emitter | 14               | 846                       | 1.5     | metal complex emitter | 15    |
| 828                       | 0.41       | metal free emitter | 8                | 855                       | 1       | metal complex emitter | 17    |
| 830                       | 2.47       | metal free emitter | 16               | 890                       | 3.8     | metal complex emitter | 18    |
| 830                       | 3.1        | metal free emitter | 35               | 900                       | 3.8     | metal complex emitter | 20    |
| 838                       | 0.58       | metal free emitter | 19               | 920                       | 1.9     | metal complex emitter | 22    |
| 840                       | 1.12       | metal free emitter | 21               | 1005                      | 0.2     | metal complex emitter | 20    |
| 840                       | 3.8        | metal free emitter | 23               | 1060                      | 0.022   | metal complex emitter | 24    |
| 850                       | 0.14       | metal free emitter | 12               | 1060                      | 0.3     | metal complex emitter | 25    |
| 852                       | 0.3        | metal free emitter | 8                |                           |         |                       |       |
| 864                       | 0.2        | metal free emitter | 4                |                           |         |                       |       |
| 868                       | 0.09       | metal free emitter | 12               |                           |         |                       |       |
| 870                       | 0.02       | metal free emitter | 12               |                           |         |                       |       |
| 883                       | 0.1        | metal free emitter | 26               |                           |         |                       |       |

|      |       |                    |    |
|------|-------|--------------------|----|
| 890  | 0.015 | metal free emitter | 27 |
| 894  | 0.23  | metal free emitter | 8  |
| 895  | 0.091 | metal free emitter | 28 |
| 901  | 1.1   | metal free emitter | 29 |
| 904  | 0.019 | metal free emitter | 30 |
| 905  | 1.32  | metal free emitter | 31 |
| 916  | 0.07  | metal free emitter | 19 |
| 939  | 0.006 | metal free emitter | 28 |
| 960  | 0.009 | metal free emitter | 26 |
| 990  | 0.018 | metal free emitter | 28 |
| 1010 | 0.003 | metal free emitter | 32 |
| 1050 | 0.05  | metal free emitter | 33 |
| 1050 | 0.16  | metal free emitter | 34 |
| 1050 | 0.33  | metal free emitter | 34 |
| 1080 | 0.73  | metal free emitter | 34 |

## 6. References

1. Q. Peng, A. Obolda, M. Zhang and F. Li, *Angew. Chem. Int. Ed.*, 2015, **54**, 7091-7095.
2. M. T. Sharbati, F. Panahi, A. Shourvarzi, S. Khademi and F. Emami, *Optik*, 2013, **124**, 52-54.
3. F. Nisic, A. Colombo, C. Dragonetti, D. Roberto, A. Valore, J. M. Malicka, M. Cocchi, G. R. Freeman and J. A. G. Williams, *J. Mater. Chem. C*, 2014, **2**, 1791-1800.
4. X. Du, J. Qi, Z. Zhang, D. Ma and Z. Y. Wang, *Chem. Mater.*, 2012, **24**, 2178-2185.
5. S. F. Wang, Y. Yuan, Y. C. Wei, W. H. Chan, L. W. Fu, B. K. Su, I. Y. Chen, K. J. Chou, P. T. Chen, H. F. Hsu, C. L. Ko, W. Y. Hung, C. S. Lee, P. T. Chou and Y. Chi, *Adv. Funct. Mater.*, 2020, **30**, 2002173.
6. Y. Yu, H. Xing, D. Liu, M. Zhao, H. H. Sung, I. D. Williams, J. W. Y. Lam, G. Xie, Z. Zhao and B. Z. Tang, *Angew. Chem. Int. Ed.*, 2022, **61**, e202204279.
7. Z. L. Zhu, S. F. Wang, L. W. Fu, J. H. Tan, C. Cao, Y. Yuan, S. M. Yiu, Y. X. Zhang, Y. Chi and C. S. Lee, *Chem. Eur. J.*, 2022, **28**, e202103202.
8. J.-F. Cheng, Z.-H. Pan, K. Zhang, Y. Zhao, C.-K. Wang, L. Ding, M.-K. Fung and J. Fan, *Chem. Eng. J.*, 2022, **430**, 132744.
9. T.-C. Lee, J.-Y. Hung, Y. Chi, Y.-M. Cheng, G.-H. Lee, P.-T. Chou, C.-C. Chen, C.-H. Chang and C.-C. Wu, *Adv. Funct. Mater.*, 2009, **19**, 2639-2647.

10. Y. Yang, R. T. Farley, T. T. Steckler, S.-H. Eom, J. R. Reynolds, K. S. Schanze and J. Xue, *Appl. Phys. Lett.*, 2008, **93**, 163305.
11. Y. Zhang, Z. Chen, X. Wang, J. He, J. Wu, H. Liu, J. Song, J. Qu, W. T. Chan and W. Y. Wong, *Inorg. Chem.*, 2018, **57**, 14208-14217.
12. G. Qian, Z. Zhong, M. Luo, D. Yu, Z. Zhang, D. Ma, and Y. Wang, *J. Phys. Chem. C*, 2009, **113**, 1589–1595.
13. Y. Zhang, Q. Li, M. Cai, J. Xue and J. Qiao, *J. Mater. Chem. C*, 2020, **8**, 8484-8492.
14. X.-Q. Wang, Y. Hu, Y.-J. Yu, Q.-S. Tian, W.-S. Shen, W.-Y. Yang, Z.-Q. Jiang and L.-S. Liao, *J. Phys. Chem. Lett.*, 2021, **12**, 6034-6040.
15. L. Huang, C. D. Park, T. Fleetham and J. Li, *Appl. Phys. Lett.*, 2016, **109**, 233302.
16. L. Tejerina, A. G. Rapidis, M. Rickhaus, P. Murto, Z. Genene, E. Wang, A. Minotto, H. L. Anderson and F. Cacialli, *J. Mater. Chem. C*, 2022, **10**, 5929-5933.
17. E. Rossi, A. Colombo, C. Dragonetti, D. Roberto, F. Demartin, M. Cocchi, P. Brulatti, V. Fattori and J. A. Williams, *Chem. Commun.*, 2012, **48**, 3182-3184.
18. J. R. Sommer, R. T. Farley, K. R. Graham, Y. Yang, J. R. Reynolds, J. Xue and K. S. Schanze, *ACS Appl. Mater. Interfaces.*, 2009, **1**, 274-278.
19. Y. J. Yu, Y. Hu, S. Y. Yang, W. Luo, Y. Yuan, C. C. Peng, J. F. Liu, A. Khan, Z. Q. Jiang and L. S. Liao, *Angew. Chem. Int. Ed.*, 2020, **59**, 21578-21584.
20. K. R. Graham, Y. Yang, J. R. Sommer, A. H. Shelton, K. S. Schanze, J. Xue and J. R. Reynolds, *Chem. Mater.*, 2011, **23**, 5305-5312.
21. A. Minotto, P. Murto, Z. Genene, A. Zampetti, G. Carnicella, W. Mammo, M. R. Andersson, E. Wang and F. Cacialli, *Adv. Mater*, 2018, **30**, 1706584.
22. L. Cao, J. Li, Z.-Q. Zhu, L. Huang and J. Li, *ACS Appl. Mater. Interfaces.*, 2021, **13**, 60261-60268.
23. A. Shahalizard, A. Malinge, L. Hu, G. Laflamme, L. Haeberlé, D. M. Myers, J. Mao, W. G. Skene and S. Kéna-Cohen, *Adv. Funct. Mater.*, 2021, **31**, 2007119.
24. A. Shahalizard, A. D'Aléo, C. Andraud, M. H. Sazzad, D.-H. Kim, Y. Tsuchiya, J.-C. Ribierre, J.-M. Nunzi and C. Adachi, *Org. Electron.*, 2017, **44**, 50-58.
25. Z.-Q. Chen, F. Ding, Z.-Q. Bian and C.-H. Huang, *Org. Electron.*, 2010, **11**, 369–376.
26. O. Fenwick, J. K. Sprafke, J. Binas, D. V. Kondratuk, F. Di Stasio, H. L. Anderson and

- F. Cacialli, *Nano. Lett.*, 2011, **11**, 2451-2456.
27. Y. Xuan, G. Qian, Z. Wang and D. Ma, *Thin Solid Films*, 2008, **516**, 7891-7893.
28. G. Tregnago, T. T. Steckler, O. Fenwick, M. R. Andersson and F. Cacialli, *J. Mater. Chem. C*, 2015, **3**, 2792-2797.
29. U. Balijapalli, R. Nagata, N. Yamada, H. Nakanotani, M. Tanaka, A. D'Aleo, V. Placide, M. Mamada, Y. Tsuchiya and C. Adachi, *Angew. Chem. Int. Ed.*, 2021, **60**, 8477-8482.
30. D. G. Congrave, B. H. Drummond, P. J. Conaghan, H. Francis, S. T. E. Jones, C. P. Grey, N. C. Greenham, D. Credgington and H. Bronstein, *J. Am. Chem. Soc.*, 2019, **141**, 18390-18394.
31. M. T. Sharbati, F. Panahi and A. Gharavi, *IEEE Photon. Technol. Lett.*, 2010, **22**, 1695-1697.
32. Q. Liang, J. Xu, J. Xue and J. Qiao, *Chem. Commun*, 2020, **56**, 8988-8991.
33. G. Qian, B. Dai, M. Luo, D. Yu, J. Zhan, Z. Zhang, D. Ma, and Z. Wang, *Chem. Mater.*, 2008, **20**, 6208-6216.
34. G. Qian, Z. Zhong, M. Luo, D. Yu, Z. Zhang, Z. Y. Wang and D. Ma, *Adv. Mater.*, 2009, **21**, 111-116.
35. J. Ding, S. Dong, M. Zhang and F. Li, *J. Mater. Chem. C*, 2022, **10**, 14116-14121.
